# Supplementary material for: Solid-State Highly Efficient DR Mono and Poly-Dicyano-Phenylenevinylene Fluorophores
Source: Preprints.org preprint supplement (doi:10.20944/preprints201805.0316.v1), 2018-05-23
Supplement: Supplementary file 1 [file supplementary]

## Supplementary Materials

# Solid-state highly efficient DR mono and poly-dicyano-phenylenevinylene fluorophores

Barbara Panunzi <sup>1</sup>, Rosita Diana <sup>2,\*</sup>, Simona Concilio <sup>3,\*</sup>, Lucia Sessa <sup>4</sup>, Rafi Shikler <sup>5</sup>, Shiran Nabha <sup>5</sup>, Angela Tuzi <sup>2</sup>, Ugo Caruso <sup>2</sup> and Stefano Piotto <sup>4</sup>

<sup>1</sup> Department of Agriculture, University of Napoli Federico II, Portici NA, Italy

<sup>2</sup> Department of Chemical Sciences, University of Napoli Federico II, Napoli, Italy

<sup>3</sup> Department of Industrial Engineering, University of Salerno, Fisciano SA, Italy

<sup>4</sup> Department of Pharmacy, University of Salerno, Fisciano SA, Italy

<sup>5</sup> Department of Electrical and Computer Engineering, Ben-Gurion University of the Negev, Israel.

\* Correspondence: rosita.diana@libero.it; sconcilio@unisa.it; Tel.: +39-089-964115

Table S1. Crystallographic data and structural refinement details of CN-PV-NHMe.

|                                                     |                                                                 |
|-----------------------------------------------------|-----------------------------------------------------------------|
| Empirical formula                                   | C <sub>35</sub> H <sub>40</sub> N <sub>4</sub> O <sub>2</sub>   |
| Formula weight                                      | 548.71                                                          |
| Temperature (K)                                     | 173(2)                                                          |
| Wavelength (Å)                                      | 0.71073                                                         |
| Crystal system                                      | Monoclinic                                                      |
| Space group                                         | C 2/c                                                           |
| <i>a</i> (Å)                                        | 25.330(7)                                                       |
| <i>b</i> (Å)                                        | 16.719(4)                                                       |
| <i>c</i> (Å)                                        | 14.804(3)                                                       |
| $\beta$ (°)                                         | 97.269(18)                                                      |
| Volume (Å <sup>3</sup> )                            | 6219(3)                                                         |
| <i>Z</i>                                            | 8                                                               |
| <i>D</i> <sub>calc</sub> (Mg/m <sup>3</sup> )       | 1.172                                                           |
| $\mu$ (mm <sup>-1</sup> )                           | 0.073                                                           |
| <i>F</i> (000)                                      | 2352                                                            |
| Crystal size (mm)                                   | 0.40 × 0.10 × 0.07                                              |
| $\theta$ range for data collection (°)              | 2.720 to 25.013                                                 |
| Limiting indices                                    | -30 ≤ <i>h</i> ≤ 30, -19 ≤ <i>k</i> ≤ 19, -17 ≤ <i>l</i> ≤ 16   |
| Reflections collected / unique                      | 27781 / 5463 [ <i>R</i> (int) = 0.2470]                         |
| Refinement method                                   | Full-matrix least-squares on <i>F</i> <sup>2</sup>              |
| Data / restraints / parameters                      | 5463 / 200 / 443                                                |
| Goodness-of-fit on <i>F</i> <sup>2</sup>            | 1.015                                                           |
| Final <i>R</i> indices [ <i>I</i> > 2σ( <i>I</i> )] | <i>R</i> <sub>1</sub> = 0.0833, <i>wR</i> <sub>2</sub> = 0.1817 |
| <i>R</i> indices (all data)                         | <i>R</i> <sub>1</sub> = 0.2390, <i>wR</i> <sub>2</sub> = 0.2521 |
| Largest diff. peak / hole (e·Å <sup>-3</sup> )      | 0.242 / -0.240                                                  |

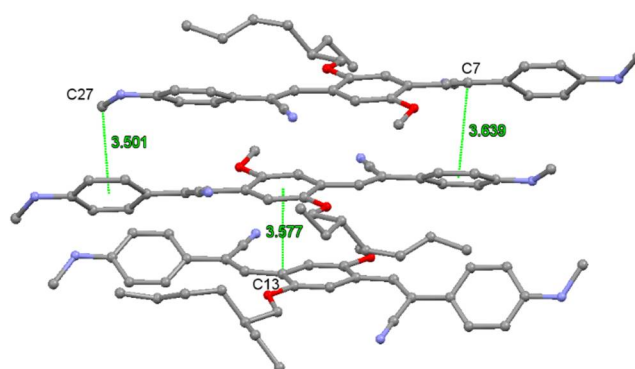

**Figure S1.** Partial packing of CN-PV-NHMe with shortest distances involving aromatic centroids reported as green dashed lines. Ball-and-stick style, H atoms are not drawn for clarity.

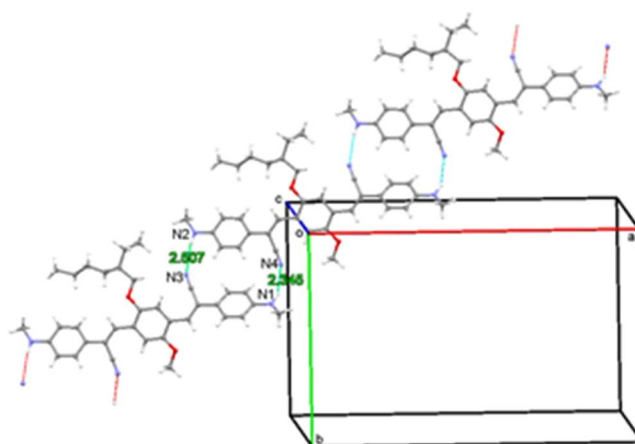

**Figure S2.** Molecular ribbon of CN-PV-NHMe propagating in the (1 -1 0) direction. Inter-molecular NH...N bonds are reported as light blue dashed lines.
